# Supplementary material for: Identification of a xenobiotic as a potential environmental trigger in primary biliary cholangitis
Source: PubMed Central journal article supplement (PMC6192827; doi:10.1016/j.jhep.2018.06.027), 2018-11
Supplement: CTAT_table.pdf [file CTAT_table.pdf]

## Journal of Hepatology

### CTAT methods

Tables for a “Complete, Transparent, Accurate and Timely account” (CTAT) are now mandatory for all revised submissions. The aim is to enhance the reproducibility of methods.

- Only include the parts relevant to your study
- Refer to the CTAT in the main text as ‘Supplementary CTAT Table’
- Do not add subheadings
- Add as many rows as needed to include all information
- Only include one item per row

If the CTAT form is not relevant to your study, please outline the reasons why:

|  |
|--|
|  |
|--|

#### 1.1 Antibodies

| Name              | Citation                                                                                                                                                    | Supplier                                                 | Cat no. | Clone no. |
|-------------------|-------------------------------------------------------------------------------------------------------------------------------------------------------------|----------------------------------------------------------|---------|-----------|
| Anti-Cyp1a1       |                                                                                                                                                             | Daiichi Chemical Co (Tokyo)                              | n/a     | n/a       |
| Anti-phospho-AMPK |                                                                                                                                                             | Cell Signalling Technologies                             | 2535S   | 40H9      |
| Anti-AMPK         |                                                                                                                                                             | Cell Signalling Technologies                             | 2603S   | 23A3      |
| Anti-β-actin      |                                                                                                                                                             | Sigma Chemical Co                                        | A1978   | AC-15     |
| Anti-CK-19        |                                                                                                                                                             | Abcam                                                    | ab84632 | n/a       |
| Anti-AMA          | Walden HR et al. Xenobiotic incorporation into pyruvate dehydrogenase complex can occur via the exogenous lipoylation pathway. Hepatology. 2008;48:1874-84. | Not commercially available – obtained from PBC patients. | -       | -         |

n/a = not available

#### 1.2 Cell lines

| Name | Citation                                                                                                                                                  | Supplier                                                                                   | Cat no. | Passage no. | Authentication test method                                                                                                                                                              |
|------|-----------------------------------------------------------------------------------------------------------------------------------------------------------|--------------------------------------------------------------------------------------------|---------|-------------|-----------------------------------------------------------------------------------------------------------------------------------------------------------------------------------------|
| B-13 | Mashima H et al. Formation of insulin-producing cells from pancreatic acinar AR42J cells by hepatocyte growth factor. Endocrinology. 1996;137(9):3969-76. | Not commercially available – originally provided by Prof David Tosh (Bath University, UK). | n/a     | >50         | Confirmed cytogenetics (Fairhall EA et al. The B-13 hepatocyte progenitor cell resists pluripotency induction and differentiation to non-hepatocyte cells. Toxicology Research 2, 308 - |

|               |                                                                                                                                                                                                                                                                                                           |                                                                                                |          |     |                                                                                                                                                                                                      |
|---------------|-----------------------------------------------------------------------------------------------------------------------------------------------------------------------------------------------------------------------------------------------------------------------------------------------------------|------------------------------------------------------------------------------------------------|----------|-----|------------------------------------------------------------------------------------------------------------------------------------------------------------------------------------------------------|
|               |                                                                                                                                                                                                                                                                                                           |                                                                                                |          |     | 320 (2013). Species (rat) confirmed by PCR-RLFP analysis of the mitochondrial genome-encoded cytochrome b according to Losi et al. (2008) using primers L14816 and H15173 for species determination. |
| H69           | Grubman SA et al. Regulation of intracellular pH by immortalized human intrahepatic biliary epithelial cell lines. Am J Physiol. 1994;266:G1060-70.                                                                                                                                                       | Not commercially available – originally obtained from Prof J Kirby (Newcastle University, UK). | n/a      | >50 | n/a.                                                                                                                                                                                                 |
| MCF7          | Soule HD et al. A human cell line from a pleural effusion derived from a breast carcinoma. J Natl Cancer Inst. 1973;51:1409-16.                                                                                                                                                                           | European collection of authenticated cell lines (ECACC) - Public Health England).              | 86012803 | >50 | See ECACC                                                                                                                                                                                            |
| HepG2         | Knowles BB et al. Human hepatocellular carcinoma cell lines secrete the major plasma proteins and hepatitis B surface antigen. Science. 1980;209:497-9.                                                                                                                                                   | European collection of authenticated cell lines (ECACC) - Public Health England).              | 85011430 | >50 | See ECACC                                                                                                                                                                                            |
| AR-EcoScreen™ | OECD guideline 458 (2016).<br><br>Ohyama SA et al. Study on anti-androgenic effects of bisphenol a diglycidyl ether (BADGE), bisphenol F diglycidyl ether (BFDGE) and their derivatives using cells stably transfected with human androgen receptor, AR-EcoScreen. Food Chem Toxicol. 2004 Jun;42:983-93. | JCRB Cell Bank (Osaka, Japan), National Institute Biomedical Innovation, health and Nutrition. | JCRB1328 | >3  | See JCRB Cell Bank.                                                                                                                                                                                  |

### 1.3 Organisms

| Name           | Citation                                                                                                                         | Supplier                  | Strain                                                                                                                                         | Sex    | Age          | Overall n number |
|----------------|----------------------------------------------------------------------------------------------------------------------------------|---------------------------|------------------------------------------------------------------------------------------------------------------------------------------------|--------|--------------|------------------|
| <i>E. coli</i> |                                                                                                                                  | ThermoFisher, Paisley, UK | TOP10                                                                                                                                          | n/a    | n/a          | n/a              |
| Mice           | Wallace K et al. The PXR is a drug target for chronic inflammatory liver disease. J Steroid Biochem Mol Biol. 2010; 120: 137-48. | Bred in house             | C57Bl6 mice bearing a transgene composed of three NF-κB sites from the Ig kappa chain promoter coupled to the gene encoding firefly luciferase | Female | 15-16 months | 11               |

### 1.4 Sequence based reagents

| Name | Sequence | Supplier |
|------|----------|----------|
|      |          |          |

### 1.5 Biological samples

| Description | Source | Identifier |
|-------------|--------|------------|
|             |        |            |

### 1.6 Deposited data

| Name of repository | Identifier | Link |
|--------------------|------------|------|
|                    |            |      |

### 1.7 Software

| Software name | Manufacturer | Version |
|---------------|--------------|---------|
|               |              |         |

### 1.8 Other (e.g. drugs, proteins, vectors etc.)

|  |  |  |
|--|--|--|
|  |  |  |
|  |  |  |

### 1.9 Please provide the details of the corresponding methods author for the manuscript:

**Professor Matthew Wright**

**2.0 Please confirm for randomised controlled trials all versions of the clinical protocol are included in the submission. These will be published online as supplementary information.**
